# Supplementary material for: The association of healthy behaviors with cognitive health expectancy in Chinese older adults: a population-based cohort study
Source: publisher site journal article supplement (doi:10.18632/aging.103617), 2020-09-09
Supplement: Supplementary file [file aging-v12i17-103617-supplementary-material-SD2.pdf]

## SUPPLEMENTARY TABLES

**Supplementary Table 1. Differences in total life expectancy and cognitive impairment-free life expectancy, and proportion of life free of cognitive impairment by modifiable factors for men and women at age 65 years accounting for mediating effect.**

| Variables <sup>a</sup> | TLE  | CIFLE | Proportion of CIFLE (%) | Difference in TLE (95%CI) | Difference in CIFLE (95%CI) | Difference in proportion of CIFLE (95%CI) |
|------------------------|------|-------|-------------------------|---------------------------|-----------------------------|-------------------------------------------|
| <b>Men</b>             |      |       |                         |                           |                             |                                           |
| Smoking status         |      |       |                         |                           |                             |                                           |
| Current                | 12.8 | 11.4  | 89.0                    | Reference                 | Reference                   | Reference                                 |
| Never                  | 13.9 | 12.2  | 87.6                    | 1.0 (0.5 to 1.5)          | 0.7 (0.2 to 1.1)            | -1.4 (-2.7 to -0.4)                       |
| Alcohol intake         |      |       |                         |                           |                             |                                           |
| No drinking            | 14.1 | 13.0  | 92.0                    | Reference                 | Reference                   | Reference                                 |
| Drinking               | 14.9 | 13.7  | 92.0                    | 0.8 (0.3 to 1.2)          | 0.7 (0.3 to 1.2)            | 0 (-0.9 to 0.9)                           |
| Dietary pattern        |      |       |                         |                           |                             |                                           |
| Unhealthy              | 14.1 | 12.8  | 91.0                    | Reference                 | Reference                   | Reference                                 |
| Healthy                | 15.0 | 13.9  | 93.0                    | 0.9 (0.3 to 1.3)          | 1.1 (0.5 to 1.5)            | 2.0 (1.4 to 4.9)                          |
| Marital status         |      |       |                         |                           |                             |                                           |
| Not in marriage        | 13.4 | 12.0  | 89.3                    | Reference                 | Reference                   | Reference                                 |
| In marriage            | 15.4 | 14.3  | 92.5                    | 2.0 (0.3 to 2.6)          | 2.3 (0.8 to 2.8)            | 3.2 (2.1 to 15.1)                         |
| Physical activities    |      |       |                         |                           |                             |                                           |
| No                     | 14.1 | 12.9  | 91.7                    | Reference                 | Reference                   | Reference                                 |
| Yes                    | 15.0 | 13.8  | 92.1                    | 0.9 (0.2 to 1.3)          | 0.9 (0.3 to 1.2)            | 0.4 (-0.2 to 3.4)                         |
| Mental activities      |      |       |                         |                           |                             |                                           |
| No                     | 13.7 | 12.5  | 90.9                    | Reference                 | Reference                   | Reference                                 |
| Yes                    | 15.3 | 14.3  | 93.0                    | 1.6 (0.5 to 2.2)          | 1.8 (0.6 to 2.3)            | 2.1 (1.2 to 6.0)                          |
| Social activities      |      |       |                         |                           |                             |                                           |
| No                     | 13.6 | 12.4  | 91.4                    | Reference                 | Reference                   | Reference                                 |
| Yes                    | 15.5 | 14.4  | 92.8                    | 1.9 (1.0 to 2.5)          | 2.0 (1.2 to 2.5)            | 1.4 (0.5 to 2.9)                          |
| Productive activities  |      |       |                         |                           |                             |                                           |
| No                     | 12.9 | 11.8  | 91.4                    | Reference                 | Reference                   | Reference                                 |
| Yes                    | 16.2 | 14.9  | 91.9                    | 3.3 (0.9 to 3.8)          | 3.1 (1.0 to 3.6)            | 0.5 (-0.1 to 4.7)                         |
| <b>Women</b>           |      |       |                         |                           |                             |                                           |
| Smoking status         |      |       |                         |                           |                             |                                           |
| Current                | 15.0 | 12.5  | 83.9                    | Reference                 | Reference                   | Reference                                 |
| Never                  | 16.0 | 13.2  | 82.6                    | 1.0 (0.5 to 1.5)          | 0.7 (0.2 to 1.1)            | -1.3 (-2.9 to 0)                          |
| Alcohol intake         |      |       |                         |                           |                             |                                           |
| No drinking            | 16.3 | 14.3  | 87.8                    | Reference                 | Reference                   | Reference                                 |
| Drinking               | 17.3 | 15.3  | 88.4                    | 1.0 (0.4 to 1.4)          | 0.9 (0.5 to 1.4)            | 0.6 (-0.6 to 2.3)                         |
| Dietary pattern        |      |       |                         |                           |                             |                                           |
| Unhealthy              | 16.2 | 13.9  | 86.0                    | Reference                 | Reference                   | Reference                                 |
| Healthy                | 17.3 | 15.5  | 89.5                    | 1.1 (0.2 to 1.5)          | 1.6 (0.7 to 2.0)            | 3.5 (2.5 to 7.9)                          |
| Marital status         |      |       |                         |                           |                             |                                           |
| Not in marriage        | 16.0 | 14.1  | 88.1                    | Reference                 | Reference                   | Reference                                 |

|                       |      |      |      |                  |                  |                     |
|-----------------------|------|------|------|------------------|------------------|---------------------|
| In marriage           | 17.5 | 15.4 | 87.5 | 1.6 (0.8 to 2.0) | 1.3 (0.6 to 1.7) | -0.6 (-3.2 to 0.7)  |
| Physical activities   |      |      |      |                  |                  |                     |
| No                    | 16.3 | 14.4 | 88.2 | Reference        | Reference        | Reference           |
| Yes                   | 17.1 | 14.9 | 86.8 | 0.8 (0.3 to 1.2) | 0.5 (0.1 to 0.8) | -1.4 (-3.9 to -0.5) |
| Mental activities     |      |      |      |                  |                  |                     |
| No                    | 15.9 | 13.8 | 86.7 | Reference        | Reference        | Reference           |
| Yes                   | 17.7 | 15.8 | 89.3 | 1.8 (0.6 to 2.4) | 2.0 (0.8 to 2.5) | 2.6 (1.4 to 6.1)    |
| Social activities     |      |      |      |                  |                  |                     |
| No                    | 15.8 | 13.8 | 87.3 | Reference        | Reference        | Reference           |
| Yes                   | 17.7 | 15.6 | 88.1 | 1.9 (1.2 to 2.4) | 1.8 (1.2 to 2.3) | 0.8 (-0.5 to 2.0)   |
| Productive activities |      |      |      |                  |                  |                     |
| No                    | 14.7 | 12.5 | 85.3 | Reference        | Reference        | Reference           |
| Yes                   | 18.5 | 16.2 | 87.4 | 3.8 (1.0 to 4.3) | 3.7 (1.3 to 4.2) | 2.1 (1.2 to 11.4)   |

TLE= total life expectancy; CIFLE= cognitive impairment-free life expectancy.

<sup>a</sup> Adjusted for age, region of residence, educational attainment, primary lifetime occupation, economic condition, functional limitation, and variables included in the table.

**Supplementary Table 2. Differences in total life expectancy and cognitive impairment-free life expectancy, and proportion of life free of cognitive impairment by modifiable factors for men and women at age 85 years accounting for mediating effect.**

| Variables <sup>a</sup> | TLE | CIFLE | Proportion of CIFLE (%) | Difference in TLE (95%CI) | Difference in CIFLE (95%CI) | Difference in proportion of CIFLE (95%CI) |
|------------------------|-----|-------|-------------------------|---------------------------|-----------------------------|-------------------------------------------|
| <b>Men</b>             |     |       |                         |                           |                             |                                           |
| Smoking status         |     |       |                         |                           |                             |                                           |
| Current                | 4.2 | 3.1   | 72.8                    | Reference                 | Reference                   | Reference                                 |
| Never                  | 4.7 | 3.5   | 73.7                    | 0.5 (0.3 to 0.7)          | 0.4 (0.2 to 0.6)            | 0.9 (-1.6 to 2.9)                         |
| Alcohol intake         |     |       |                         |                           |                             |                                           |
| No drinking            | 4.8 | 3.7   | 78.5                    | Reference                 | Reference                   | Reference                                 |
| Drinking               | 5.1 | 4.0   | 78.5                    | 0.4 (0.1 to 0.6)          | 0.3 (0.1 to 0.5)            | 0 (-1.6 to 1.6)                           |
| Dietary pattern        |     |       |                         |                           |                             |                                           |
| Unhealthy              | 4.7 | 3.6   | 75.7                    | Reference                 | Reference                   | Reference                                 |
| Healthy                | 5.2 | 4.4   | 83.0                    | 0.5 (-0.2 to 0.8)         | 0.8 (0.2 to 1.0)            | 7.3 (5.5 to 15.7)                         |
| Marital status         |     |       |                         |                           |                             |                                           |
| Not in marriage        | 4.5 | 3.5   | 76.8                    | Reference                 | Reference                   | Reference                                 |
| In marriage            | 5.4 | 4.3   | 79.9                    | 0.9 (0.1 to 1.1)          | 0.8 (0.2 to 1.1)            | 3.1 (1.3 to 8.6)                          |
| Physical activities    |     |       |                         |                           |                             |                                           |
| No                     | 4.6 | 3.5   | 76.3                    | Reference                 | Reference                   | Reference                                 |
| Yes                    | 5.3 | 4.3   | 82.0                    | 0.7 (-0.2 to 1.0)         | 0.8 (0.1 to 1.0)            | 5.7 (3.6 to 16.1)                         |
| Mental activities      |     |       |                         |                           |                             |                                           |
| No                     | 4.6 | 3.4   | 75.6                    | Reference                 | Reference                   | Reference                                 |
| Yes                    | 5.5 | 4.6   | 84.2                    | 0.9 (-0.1 to 1.3)         | 1.2 (0.2 to 1.5)            | 8.6 (6.2 to 23.3)                         |
| Social activities      |     |       |                         |                           |                             |                                           |
| No                     | 4.5 | 3.4   | 75.7                    | Reference                 | Reference                   | Reference                                 |
| Yes                    | 5.6 | 4.8   | 85.5                    | 1.2 (0.3 to 1.6)          | 1.4 (0.8 to 1.8)            | 9.8 (7.1 to 18.6)                         |
| Productive activities  |     |       |                         |                           |                             |                                           |
| No                     | 4.1 | 3.1   | 74.7                    | Reference                 | Reference                   | Reference                                 |
| Yes                    | 5.9 | 4.7   | 80.7                    | 1.8 (0.1 to 2.1)          | 1.7 (0.3 to 2.0)            | 6.0 (3.9 to 17.0)                         |
| <b>Women</b>           |     |       |                         |                           |                             |                                           |
| Smoking status         |     |       |                         |                           |                             |                                           |
| Current                | 5.1 | 2.9   | 56.8                    | Reference                 | Reference                   | Reference                                 |
| Never                  | 5.6 | 3.4   | 60.2                    | 0.5 (0.3 to 0.7)          | 0.5 (0.3 to 0.6)            | 3.4 (0.3 to 5.8)                          |
| Alcohol intake         |     |       |                         |                           |                             |                                           |
| No drinking            | 5.7 | 3.7   | 65.7                    | Reference                 | Reference                   | Reference                                 |
| Drinking               | 6.2 | 4.1   | 66.6                    | 0.5 (0.2 to 0.7)          | 0.4 (0.1 to 0.5)            | 0.9 (-0.8 to 2.9)                         |
| Dietary pattern        |     |       |                         |                           |                             |                                           |
| Unhealthy              | 5.7 | 3.5   | 62.4                    | Reference                 | Reference                   | Reference                                 |
| Healthy                | 6.3 | 4.4   | 71.1                    | 0.6 (-0.2 to 0.9)         | 0.9 (0.2 to 1.1)            | 8.7 (6.9 to 12.0)                         |
| Marital status         |     |       |                         |                           |                             |                                           |
| Not in marriage        | 5.5 | 3.5   | 64.0                    | Reference                 | Reference                   | Reference                                 |
| In marriage            | 6.5 | 4.5   | 69.2                    | 1.0 (0.1 to 1.3)          | 1.0 (0.2 to 1.2)            | 5.2 (2.8 to 8.6)                          |
| Physical activities    |     |       |                         |                           |                             |                                           |

|                       |     |     |      |                   |                  |                     |
|-----------------------|-----|-----|------|-------------------|------------------|---------------------|
| No                    | 5.6 | 3.6 | 65.0 | Reference         | Reference        | Reference           |
| Yes                   | 6.3 | 4.3 | 67.8 | 0.7 (0 to 1.0)    | 0.6 (0.1 to 0.8) | 2.8 (1.2 to 5.7)    |
| Mental activities     |     |     |      |                   |                  |                     |
| No                    | 5.5 | 3.5 | 63.5 | Reference         | Reference        | Reference           |
| Yes                   | 6.9 | 5.5 | 79.7 | 1.3 (-0.6 to 1.9) | 2.0 (0.4 to 2.4) | 16.2 (12.8 to 34.1) |
| Social activities     |     |     |      |                   |                  |                     |
| No                    | 5.4 | 3.5 | 63.9 | Reference         | Reference        | Reference           |
| Yes                   | 6.6 | 4.7 | 71.5 | 1.2 (0.5 to 1.5)  | 1.2 (0.7 to 1.6) | 7.6 (4.9 to 11.8)   |
| Productive activities |     |     |      |                   |                  |                     |
| No                    | 4.8 | 2.8 | 57.7 | Reference         | Reference        | Reference           |
| Yes                   | 7.0 | 4.7 | 67.8 | 2.1 (0.2 to 2.6)  | 1.9 (0.4 to 2.4) | 10.1 (7.5 to 14.8)  |

TLE= total life expectancy; CIFLE= cognitive impairment-free life expectancy.

<sup>a</sup> Adjusted for age, region of residence, educational attainment, primary lifetime occupation, economic condition, functional limitation, and variables included in the table.

**Supplementary Table 3. Differences in total life expectancy and cognitive impairment-free life expectancy, and proportion of life free of cognitive impairment by modifiable factors for men and women at age 65 years accounting for reverse causation.**

| Variables <sup>a</sup> | TLE  | CIFLE | Proportion of CIFLE (%) | Difference in TLE (95%CI) | Difference in CIFLE (95%CI) | Difference in proportion of CIFLE (95%CI) |
|------------------------|------|-------|-------------------------|---------------------------|-----------------------------|-------------------------------------------|
| <b>Men</b>             |      |       |                         |                           |                             |                                           |
| Smoking status         |      |       |                         |                           |                             |                                           |
| Current                | 12.4 | 11.9  | 95.7                    | Reference                 | Reference                   | Reference                                 |
| Never                  | 13.5 | 12.7  | 94.5                    | 1.1 (0.5 to 1.5)          | 0.9 (0.4 to 1.4)            | -1.2 (-1.5 to -0.6)                       |
| Alcohol intake         |      |       |                         |                           |                             |                                           |
| No drinking            | 12.7 | 12.2  | 96.2                    | Reference                 | Reference                   | Reference                                 |
| Drinking               | 13.3 | 12.8  | 96.0                    | 0.6 (0.1 to 1.0)          | 0.5 (-0.1 to 1.0)           | -0.2 (-0.5 to 0.3)                        |
| Dietary pattern        |      |       |                         |                           |                             |                                           |
| Unhealthy              | 12.5 | 11.9  | 95.1                    | Reference                 | Reference                   | Reference                                 |
| Healthy                | 13.6 | 13.2  | 97.0                    | 1.1 (0.5 to 1.5)          | 1.3 (0.6 to 1.6)            | 1.9 (0.8 to 2.4)                          |
| Marital status         |      |       |                         |                           |                             |                                           |
| Not in marriage        | 12.0 | 11.3  | 94.6                    | Reference                 | Reference                   | Reference                                 |
| In marriage            | 13.8 | 13.2  | 95.9                    | 1.8 (1.0 to 2.3)          | 1.9 (1.2 to 2.3)            | 1.3 (0.5 to 3.4)                          |
| Physical activities    |      |       |                         |                           |                             |                                           |
| No                     | 12.6 | 12.1  | 95.8                    | Reference                 | Reference                   | Reference                                 |
| Yes                    | 13.4 | 12.9  | 96.2                    | 0.7 (0.3 to 1.1)          | 0.8 (0.3 to 1.1)            | 0.4 (0 to 0.9)                            |
| Mental activities      |      |       |                         |                           |                             |                                           |
| No                     | 12.2 | 11.7  | 95.5                    | Reference                 | Reference                   | Reference                                 |
| Yes                    | 13.8 | 13.4  | 96.6                    | 1.6 (0.7 to 2.1)          | 1.7 (0.8 to 2.2)            | 1.1 (0.3 to 1.9)                          |
| Social activities      |      |       |                         |                           |                             |                                           |
| No                     | 12.2 | 11.7  | 96.0                    | Reference                 | Reference                   | Reference                                 |
| Yes                    | 13.9 | 13.5  | 97.1                    | 1.7 (1.0 to 2.2)          | 1.8 (1.3 to 2.1)            | 1.1 (0.5 to 2.0)                          |
| Productive activities  |      |       |                         |                           |                             |                                           |
| No                     | 11.5 | 11.1  | 96.1                    | Reference                 | Reference                   | Reference                                 |
| Yes                    | 14.5 | 13.8  | 95.4                    | 3.0 (2.0 to 3.3)          | 2.7 (1.9 to 3.2)            | -0.7 (-1.0 to 0.8)                        |
| <b>Women</b>           |      |       |                         |                           |                             |                                           |
| Smoking status         |      |       |                         |                           |                             |                                           |
| Current                | 13.9 | 12.9  | 93.1                    | Reference                 | Reference                   | Reference                                 |
| Never                  | 15.0 | 13.8  | 91.8                    | 1.1 (0.6 to 1.6)          | 0.8 (0.5 to 1.4)            | -1.3 (-1.7 to -0.4)                       |
| Alcohol intake         |      |       |                         |                           |                             |                                           |
| No drinking            | 14.2 | 13.3  | 93.4                    | Reference                 | Reference                   | Reference                                 |
| Drinking               | 14.9 | 14.0  | 93.6                    | 0.7 (0.1 to 1.2)          | 0.7 (0.2 to 1.1)            | 0.2 (-0.4 to 1.1)                         |
| Dietary pattern        |      |       |                         |                           |                             |                                           |
| Unhealthy              | 13.9 | 12.6  | 91.3                    | Reference                 | Reference                   | Reference                                 |
| Healthy                | 15.2 | 14.4  | 94.9                    | 1.3 (0.6 to 1.8)          | 1.8 (0.9 to 2.1)            | 3.6 (1.7 to 4.8)                          |
| Marital status         |      |       |                         |                           |                             |                                           |
| Not in marriage        | 13.9 | 13.1  | 94.5                    | Reference                 | Reference                   | Reference                                 |
| In marriage            | 15.2 | 13.9  | 91.8                    | 1.3 (0.8 to 1.7)          | 0.8 (0.4 to 1.4)            | -2.7 (-3.5 to -1.0)                       |
| Physical activities    |      |       |                         |                           |                             |                                           |
| No                     | 14.2 | 13.3  | 93.6                    | Reference                 | Reference                   | Reference                                 |

|                              |      |      |      |                  |                  |                     |
|------------------------------|------|------|------|------------------|------------------|---------------------|
| Yes                          | 14.8 | 13.7 | 92.4 | 0.6 (0.1 to 0.9) | 0.4 (0 to 0.7)   | -1.2 (-1.8 to -0.4) |
| <b>Mental activities</b>     |      |      |      |                  |                  |                     |
| No                           | 13.7 | 12.8 | 92.8 | Reference        | Reference        | Reference           |
| Yes                          | 15.4 | 14.5 | 94.1 | 1.6 (0.8 to 2.2) | 1.7 (0.9 to 2.2) | 1.3 (0.3 to 2.3)    |
| <b>Social activities</b>     |      |      |      |                  |                  |                     |
| No                           | 13.7 | 12.8 | 93.5 | Reference        | Reference        | Reference           |
| Yes                          | 15.3 | 14.2 | 92.9 | 1.6 (1.0 to 2.0) | 1.4 (0.9 to 1.9) | -0.6 (-1.4 to 0.3)  |
| <b>Productive activities</b> |      |      |      |                  |                  |                     |
| No                           | 12.6 | 11.5 | 91.2 | Reference        | Reference        | Reference           |
| Yes                          | 16.0 | 14.8 | 92.4 | 3.4 (2.2 to 3.9) | 3.3 (2.5 to 3.9) | 1.2 (0.2 to 4.9)    |

TLE= total life expectancy; CIFLE= cognitive impairment-free life expectancy.

<sup>a</sup> Adjusted for age, region of residence, educational attainment, primary lifetime occupation, economic condition, functional limitation, chronic diseases, and variables included in the table.

**Supplementary Table 4. Differences in total life expectancy and cognitive impairment-free life expectancy, and proportion of life free of cognitive impairment by modifiable factors for men and women at age 85 years accounting for reverse causation.**

| Variables <sup>a</sup> | TLE | CIFLE | Proportion of CIFLE (%) | Difference in TLE (95%CI) | Difference in CIFLE (95%CI) | Difference in proportion of CIFLE (95%CI) |
|------------------------|-----|-------|-------------------------|---------------------------|-----------------------------|-------------------------------------------|
| <b>Men</b>             |     |       |                         |                           |                             |                                           |
| Smoking status         |     |       |                         |                           |                             |                                           |
| Current                | 3.7 | 3.2   | 86.5                    | Reference                 | Reference                   | Reference                                 |
| Never                  | 4.1 | 3.5   | 84.4                    | 0.4 (0.2 to 0.6)          | 0.3 (0.1 to 0.5)            | -2.1 (-2.9 to -0.5)                       |
| Alcohol intake         |     |       |                         |                           |                             |                                           |
| No drinking            | 3.8 | 3.2   | 86.0                    | Reference                 | Reference                   | Reference                                 |
| Drinking               | 4.1 | 3.6   | 87.1                    | 0.3 (0.1 to 0.5)          | 0.3 (0.1 to 0.5)            | 1.1 (-0.1 to 3.0)                         |
| Dietary pattern        |     |       |                         |                           |                             |                                           |
| Unhealthy              | 3.7 | 3.1   | 83.3                    | Reference                 | Reference                   | Reference                                 |
| Healthy                | 4.2 | 3.8   | 90.6                    | 0.5 (0.2 to 0.8)          | 0.8 (0.3 to 1)              | 7.3 (3.4 to 11.6)                         |
| Marital status         |     |       |                         |                           |                             |                                           |
| Not in marriage        | 3.6 | 3.1   | 86.2                    | Reference                 | Reference                   | Reference                                 |
| In marriage            | 4.3 | 3.7   | 86.1                    | 0.7 (0.3 to 0.8)          | 0.6 (0.3 to 0.8)            | -0.1 (-1.1 to 2.8)                        |
| Physical activities    |     |       |                         |                           |                             |                                           |
| No                     | 3.7 | 3.1   | 84.1                    | Reference                 | Reference                   | Reference                                 |
| Yes                    | 4.2 | 3.8   | 89.8                    | 0.5 (0.1 to 0.7)          | 0.7 (0.3 to 0.8)            | 5.7 (2.4 to 10.6)                         |
| Mental activities      |     |       |                         |                           |                             |                                           |
| No                     | 3.6 | 3.0   | 83.4                    | Reference                 | Reference                   | Reference                                 |
| Yes                    | 4.4 | 4.1   | 91.6                    | 0.9 (0.2 to 1.2)          | 1.1 (0.5 to 1.4)            | 8.2 (3.2 to 16.3)                         |
| Social activities      |     |       |                         |                           |                             |                                           |
| No                     | 3.5 | 3.0   | 84.1                    | Reference                 | Reference                   | Reference                                 |
| Yes                    | 4.5 | 4.2   | 92.2                    | 1.0 (0.3 to 1.4)          | 1.2 (0.5 to 1.5)            | 8.1 (3.4 to 18.4)                         |
| Productive activities  |     |       |                         |                           |                             |                                           |
| No                     | 3.2 | 2.6   | 82.7                    | Reference                 | Reference                   | Reference                                 |
| Yes                    | 4.7 | 4.1   | 87.7                    | 1.5 (0.6 to 1.8)          | 1.5 (0.7 to 1.8)            | 5.0 (1.6 to 13.4)                         |
| <b>Women</b>           |     |       |                         |                           |                             |                                           |
| Smoking status         |     |       |                         |                           |                             |                                           |
| Current                | 4.1 | 2.9   | 69.5                    | Reference                 | Reference                   | Reference                                 |
| Never                  | 4.7 | 3.5   | 73.5                    | 0.6 (0.4 to 0.8)          | 0.6 (0.4 to 0.8)            | 4.0 (1.8 to 6.5)                          |
| Alcohol intake         |     |       |                         |                           |                             |                                           |
| No drinking            | 4.4 | 3.2   | 74.5                    | Reference                 | Reference                   | Reference                                 |
| Drinking               | 4.7 | 3.4   | 73.1                    | 0.3 (0.1 to 0.5)          | 0.2 (0 to 0.3)              | -1.4 (-3.1 to 0.4)                        |
| Dietary pattern        |     |       |                         |                           |                             |                                           |
| Unhealthy              | 4.3 | 3.0   | 69.4                    | Reference                 | Reference                   | Reference                                 |
| Healthy                | 4.9 | 3.9   | 80.4                    | 0.6 (0.1 to 0.9)          | 0.9 (0.4 to 1.2)            | 11.0 (6.2 to 15.0)                        |
| Marital status         |     |       |                         |                           |                             |                                           |
| Not in marriage        | 4.1 | 3.0   | 73.8                    | Reference                 | Reference                   | Reference                                 |
| In marriage            | 5.0 | 3.8   | 75.5                    | 0.9 (0.4 to 1.0)          | 0.7 (0.4 to 0.9)            | 1.7 (-0.3 to 6.1)                         |
| Physical activities    |     |       |                         |                           |                             |                                           |
| No                     | 4.3 | 3.1   | 73.6                    | Reference                 | Reference                   | Reference                                 |

|                       |     |     |      |                  |                  |                    |
|-----------------------|-----|-----|------|------------------|------------------|--------------------|
| Yes                   | 4.8 | 3.6 | 75.2 | 0.5 (0.2 to 0.6) | 0.5 (0.2 to 0.6) | 1.6 (0.2 to 3.2)   |
| Mental activities     |     |     |      |                  |                  |                    |
| No                    | 4.2 | 3.0 | 71.7 | Reference        | Reference        | Reference          |
| Yes                   | 5.3 | 4.7 | 88.1 | 1.1 (0.2 to 1.7) | 1.7 (0.7 to 2.0) | 16.4 (8.0 to 29.5) |
| Social activities     |     |     |      |                  |                  |                    |
| No                    | 4.1 | 3.0 | 72.2 | Reference        | Reference        | Reference          |
| Yes                   | 5.2 | 4.2 | 81.9 | 1.0 (0.3 to 1.4) | 1.2 (0.6 to 1.6) | 9.7 (4.7 to 19.0)  |
| Productive activities |     |     |      |                  |                  |                    |
| No                    | 3.6 | 2.2 | 62.8 | Reference        | Reference        | Reference          |
| Yes                   | 5.4 | 4.1 | 75.3 | 1.8 (0.7 to 2.2) | 1.8 (0.9 to 2.2) | 12.5 (6.2 to 22.4) |

TLE= total life expectancy; CIFLE= cognitive impairment-free life expectancy.

<sup>a</sup> Adjusted for age, region of residence, educational attainment, primary lifetime occupation, economic condition, functional limitation, chronic diseases, and variables included in the table.

**Supplementary Table 5. Differences in total life expectancy and cognitive impairment-free life expectancy, and proportion of life free of cognitive impairment by four risk profile groups for men and women at age 65 and 85 years accounting for mediating effect.**

| Age | Variables <sup>a</sup> | High risk profile | Medium-high risk profile | Medium-low risk profile | Low risk profile | Difference of Medium-high vs High (95%CI) | Difference of Medium-low vs High (95%CI) | Difference of low vs High (95%CI) |
|-----|------------------------|-------------------|--------------------------|-------------------------|------------------|-------------------------------------------|------------------------------------------|-----------------------------------|
| 65y | Men                    |                   |                          |                         |                  |                                           |                                          |                                   |
|     | TLE                    | 9.3               | 12.0                     | 13.8                    | 15.5             | 2.7 (2.2 to 3.2)                          | 4.5 (4.0 to 5.0)                         | 6.2 (5.3 to 7.2)                  |
|     | CIFLE                  | 8.3               | 10.5                     | 12.2                    | 13.9             | 2.1 (1.7 to 2.7)                          | 3.8 (3.5 to 4.4)                         | 5.6 (4.9 to 6.7)                  |
|     | Proportion (%)         | 89.6              | 87.4                     | 88.0                    | 89.9             | -2.2 (-3.2 to -1.1)                       | -1.6 (-2.8 to -0.5)                      | 0.3 (-1.8 to 2.4)                 |
|     | Women                  |                   |                          |                         |                  |                                           |                                          |                                   |
|     | TLE                    | 11.3              | 14.1                     | 16.1                    | 17.8             | 2.9 (2.4 to 3.4)                          | 4.8 (4.3 to 5.3)                         | 6.6 (5.6 to 7.6)                  |
| 85y | CIFLE                  | 9.5               | 11.5                     | 13.2                    | 15.1             | 2.0 (1.6 to 2.6)                          | 3.7 (3.4 to 4.4)                         | 5.6 (5.0 to 6.8)                  |
|     | Proportion (%)         | 83.7              | 81.2                     | 81.9                    | 84.4             | -2.5 (-4.1 to -1.0)                       | -1.8 (-3.6 to -0.2)                      | 0.7 (-2.3 to 3.7)                 |
|     | Men                    |                   |                          |                         |                  |                                           |                                          |                                   |
|     | TLE                    | 2.6               | 3.7                      | 4.5                     | 5.2              | 1.1 (0.9 to 1.3)                          | 1.9 (1.7 to 2.1)                         | 2.6 (2.2 to 3.1)                  |
|     | CIFLE                  | 2.0               | 2.7                      | 3.4                     | 4.1              | 0.8 (0.6 to 1.0)                          | 1.4 (1.3 to 1.6)                         | 2.2 (1.8 to 2.6)                  |
|     | Proportion (%)         | 74.3              | 73.1                     | 74.8                    | 78.6             | -1.2 (-3.2 to 0.8)                        | 0.5 (-1.8 to 2.4)                        | 4.3 (0.3 to 7.8)                  |
|     | Women                  |                   |                          |                         |                  |                                           |                                          |                                   |
|     | TLE                    | 3.4               | 4.6                      | 5.5                     | 6.2              | 1.3 (1.1 to 1.4)                          | 2.1 (1.9 to 2.4)                         | 2.8 (2.4 to 3.4)                  |
|     | CIFLE                  | 2.0               | 2.7                      | 3.3                     | 4.1              | 0.7 (0.5 to 0.8)                          | 1.3 (1.1 to 1.5)                         | 2.0 (1.7 to 2.4)                  |
|     | Proportion (%)         | 60.2              | 58.5                     | 60.7                    | 65.4             | -1.7 (-4.0 to 0.6)                        | 0.5 (-2.5 to 2.8)                        | 5.2 (0.2 to 9.8)                  |

TLE= total life expectancy; CIFLE= cognitive-impairment-free life expectancy.

<sup>a</sup> Adjusted for age, region of residence, educational attainment, primary lifetime occupation, economic condition, and functional limitation.



**Supplementary Table 6. Differences in total life expectancy and cognitive impairment-free life expectancy, and proportion of life free of cognitive impairment by four risk profile groups for men and women at age 65 and 85 years accounting for reverse causation.**

| Age | Variables <sup>a</sup> | High risk profile | Medium-high risk profile | Medium-low risk profile | Low risk profile | Difference of Medium-high vs High (95%CI) | Difference of Medium-low vs High (95%CI) | Difference of low vs High (95%CI) |
|-----|------------------------|-------------------|--------------------------|-------------------------|------------------|-------------------------------------------|------------------------------------------|-----------------------------------|
| 65y | Men                    |                   |                          |                         |                  |                                           |                                          |                                   |
|     | TLE                    | 9.2               | 11.8                     | 13.4                    | 15.1             | 2.7 (2.0 to 3.0)                          | 4.3 (3.3 to 4.6)                         | 5.9 (4.6 to 6.5)                  |
|     | CIFLE                  | 8.9               | 11.3                     | 12.7                    | 14.4             | 2.4 (1.9 to 2.9)                          | 3.8 (3.1 to 4.3)                         | 5.5 (4.4 to 6.2)                  |
|     | Proportion (%)         | 97.2              | 95.5                     | 94.8                    | 95.4             | -1.7 (-1.9 to -0.6)                       | -2.4 (-2.6 to -0.6)                      | -1.8 (-2.3 to -0.1)               |
|     | Women                  |                   |                          |                         |                  |                                           |                                          |                                   |
|     | TLE                    | 10.8              | 13.5                     | 15.2                    | 17.0             | 2.7 (2.1 to 3.2)                          | 4.4 (3.6 to 4.9)                         | 6.2 (4.9 to 6.9)                  |
| 85y | CIFLE                  | 10.3              | 12.5                     | 13.8                    | 15.6             | 2.2 (1.9 to 3.0)                          | 3.6 (3.1 to 4.5)                         | 5.4 (4.6 to 6.4)                  |
|     | Proportion (%)         | 95.1              | 92.2                     | 91.1                    | 92.1             | -2.9 (-3.1 to -0.7)                       | -4.0 (-4.2 to -1.1)                      | -3.0 (-3.7 to -0.3)               |
|     | Men                    |                   |                          |                         |                  |                                           |                                          |                                   |
|     | TLE                    | 2.3               | 3.3                      | 4.0                     | 4.8              | 1.1 (0.7 to 1.2)                          | 1.8 (1.3 to 2.0)                         | 2.5 (1.7 to 2.7)                  |
|     | CIFLE                  | 1.9               | 2.7                      | 3.4                     | 4.2              | 0.9 (0.6 to 1.0)                          | 1.5 (1.2 to 1.7)                         | 2.3 (1.8 to 2.6)                  |
|     | Proportion (%)         | 82.7              | 82.2                     | 85.7                    | 86.8             | -0.5 (-1.3 to 0.5)                        | 2.9 (0.3 to 3.1)                         | 4.1 (0.2 to 6.1)                  |
|     | Women                  |                   |                          |                         |                  |                                           |                                          |                                   |
|     | TLE                    | 2.8               | 3.9                      | 4.7                     | 5.5              | 1.1 (0.8 to 1.2)                          | 1.9 (1.3 to 2.1)                         | 2.7 (1.9 to 2.8)                  |
|     | CIFLE                  | 2.1               | 2.9                      | 3.6                     | 4.3              | 0.8 (0.6 to 1.0)                          | 1.5 (1.2 to 1.7)                         | 2.2 (1.7 to 2.4)                  |
|     | Proportion (%)         | 75.9              | 74.9                     | 76.2                    | 78.2             | -0.9 (-1.3 to 2.6)                        | 0.3 (-0.6 to 4.4)                        | 2.4 (0 to 8.2)                    |

TLE= total life expectancy; CIFLE= cognitive-impairment-free life expectancy.

<sup>a</sup> Adjusted for age, region of residence, educational attainment, primary lifetime occupation, economic condition, functional limitation, and chronic diseases.
